# Supplementary material
Source: PubMed Central journal article supplement (PMC8282435)
Supplement: mmc1.pdf [file mmc1.pdf]

**Appendix**  
**Racial and Ethnic Disparities in SARS-CoV-2 Testing and COVID-19 Outcomes in a Medicaid**  
**Managed Care Cohort**  
**Jacobson et al.**

**Appendix Figure 1.** Testing rates, percent positive, and hospitalizations and deaths per 10,000 by race/ethnicity.

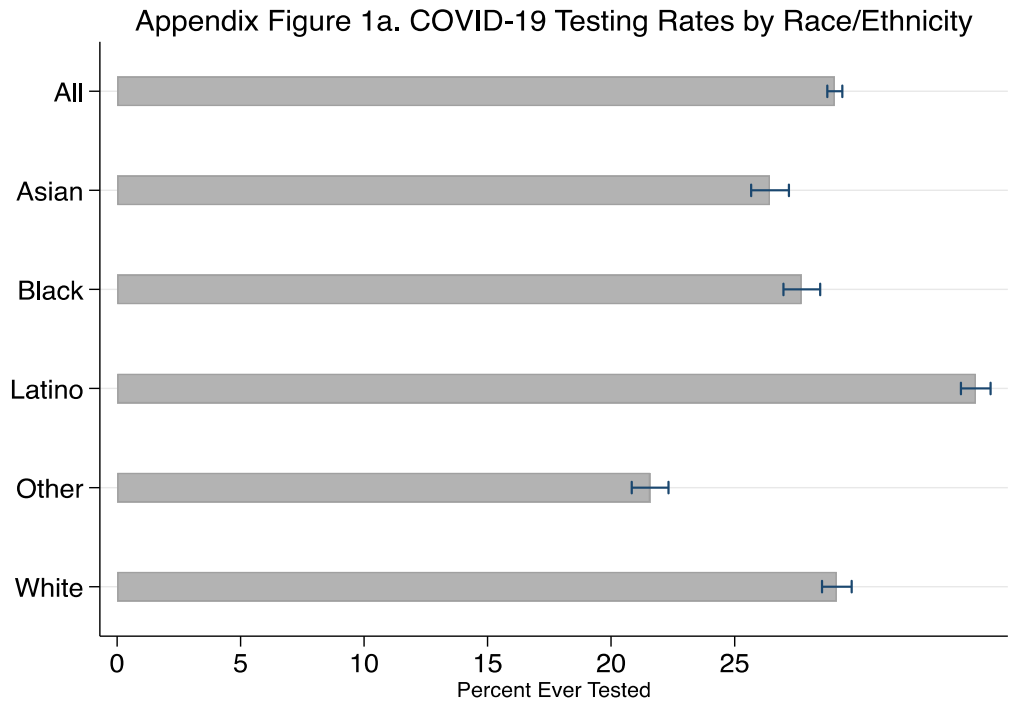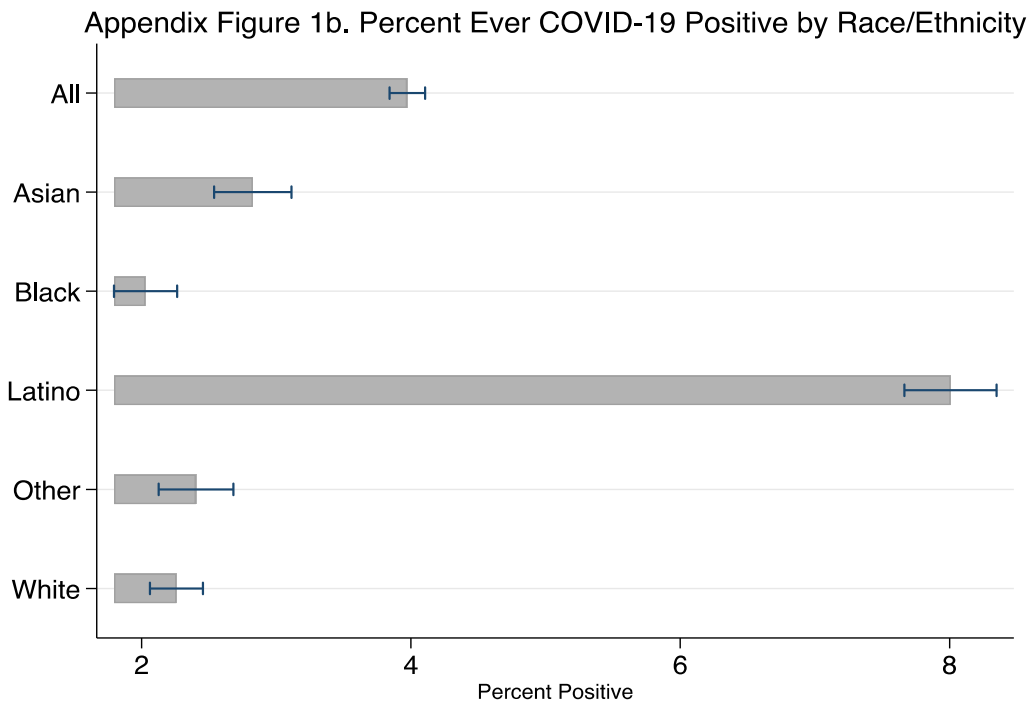

**Appendix**  
**Racial and Ethnic Disparities in SARS-CoV-2 Testing and COVID-19 Outcomes in a Medicaid**  
**Managed Care Cohort**  
**Jacobson et al.**

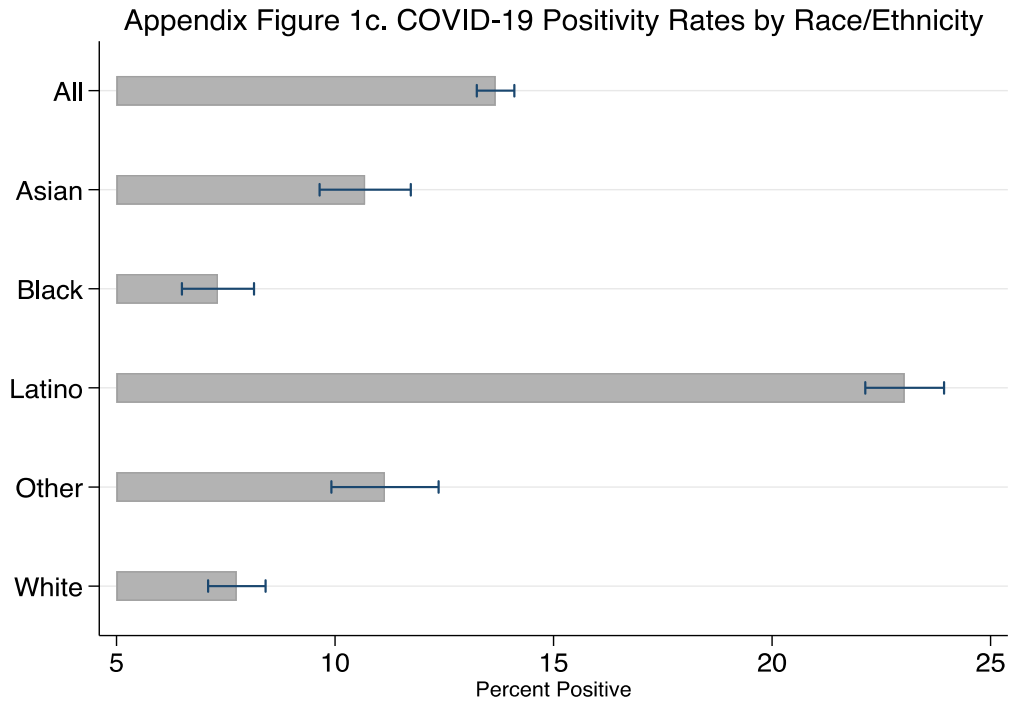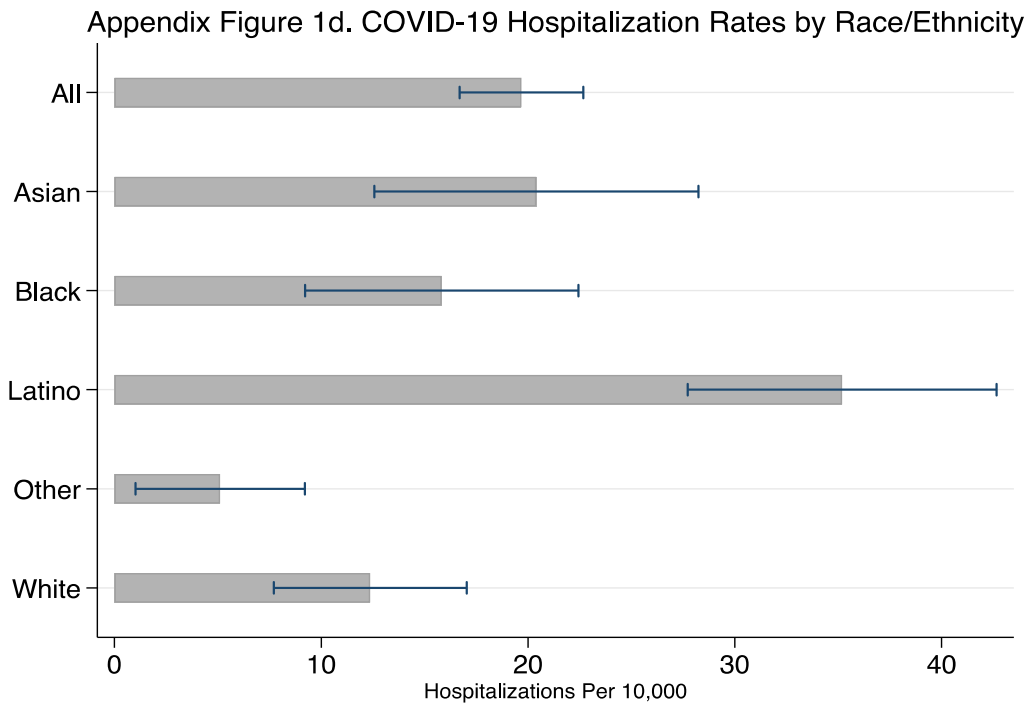

**Appendix**  
**Racial and Ethnic Disparities in SARS-CoV-2 Testing and COVID-19 Outcomes in a Medicaid**  
**Managed Care Cohort**  
**Jacobson et al.**

Appendix Figure 1e. COVID-19 Death Rates by Race/Ethnicity

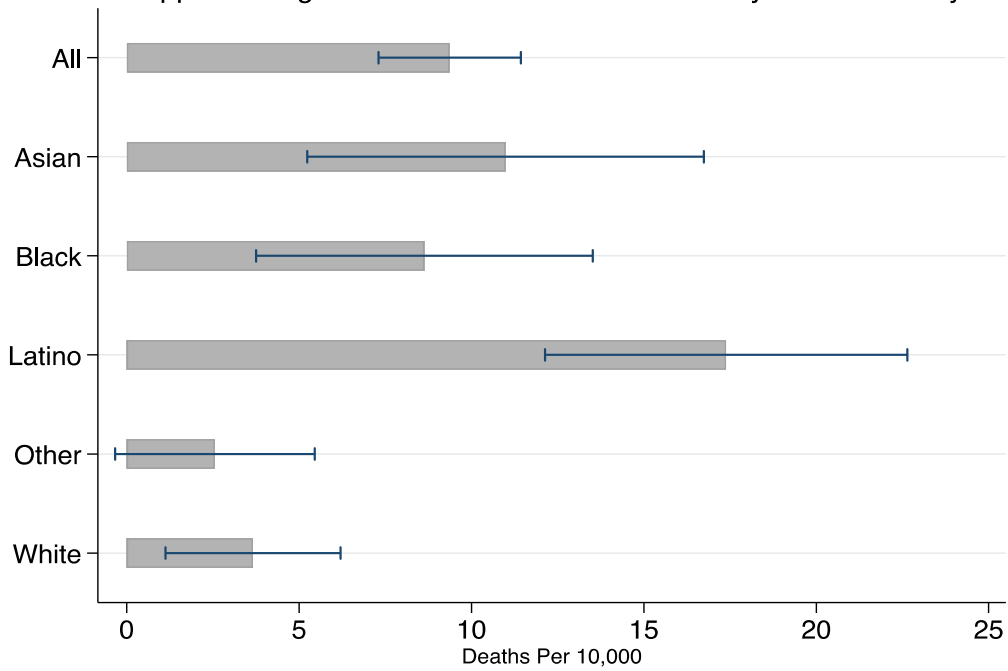

**Appendix**  
**Racial and Ethnic Disparities in SARS-CoV-2 Testing and COVID-19 Outcomes in a Medicaid Managed Care Cohort**  
**Jacobson et al.**

**Appendix Table 1.** ZIP Code Characteristics of Patient Population Overall and by Race/Ethnicity<sup>a</sup>

| <b>Variable</b>                                   | <b>Total</b> | <b>Asian</b> | <b>Black/African American</b> | <b>Latino</b> | <b>Other/Unknown<sup>b</sup></b> | <b>White/Caucasian</b> |
|---------------------------------------------------|--------------|--------------|-------------------------------|---------------|----------------------------------|------------------------|
| Impaneled patients                                | 83,310       | 12,686       | 13,641                        | 24,014        | 11,577                           | 21,392                 |
| Percent of total                                  |              | 15%          | 16%                           | 29%           | 14%                              | 26%                    |
| <b>ZIP code characteristics</b>                   |              |              |                               |               |                                  |                        |
| Median income, \$                                 | 85,455       | 90,097       | 77,234                        | 77,433        | 90,593                           | 94,169                 |
| SD                                                | (27,669)     | (28,914)     | (21,726)                      | (20,577)      | (32,510)                         | (30,318)               |
| Average HH size                                   | 3.03         | 3.02         | 3.13                          | 3.12          | 3.00                             | 2.90                   |
| SD                                                | 0.34         | 0.33         | 0.30                          | 0.30          | 0.35                             | 0.37                   |
| Share employed                                    | 0.61         | 0.62         | 0.61                          | 0.61          | 0.61                             | 0.62                   |
| Share uninsured                                   | 0.07         | 0.07         | 0.08                          | 0.08          | 0.07                             | 0.06                   |
| Share cash assistance                             | 0.03         | 0.03         | 0.04                          | 0.04          | 0.03                             | 0.03                   |
| Share Social Security                             | 0.28         | 0.28         | 0.27                          | 0.27          | 0.28                             | 0.29                   |
| Share receiving SNAP                              | 0.10         | 0.09         | 0.11                          | 0.11          | 0.09                             | 0.08                   |
| Share detached single family home                 | 0.65         | 0.66         | 0.65                          | 0.64          | 0.66                             | 0.66                   |
| <b>Number of ZIP codes</b>                        |              |              |                               |               |                                  |                        |
| Overall                                           | 467          | 162          | 181                           | 197           | 206                              | 311                    |
| With ≥50 patients                                 | 45           | 45           | 45                            | 45            | 45                               | 45                     |
| Impaneled patients in ZIP codes with ≥50 patients | 81,482       | 12,455       | 13,227                        | 23,765        | 11,295                           | 20,740                 |
| Percent of all patients                           | 98%          | 98%          | 97%                           | 99%           | 98%                              | 97%                    |

<sup>a</sup>Data are from the 2018 American Community Survey (ACS).

<sup>b</sup>Due to small numbers (N=280) American Indian/Native Alaskan is included with Other/Unknown.

HH, household; SNAP, Supplemental Nutrition Assistance Program.

**Appendix**  
**Racial and Ethnic Disparities in SARS-CoV-2 Testing and COVID-19 Outcomes in a Medicaid Managed Care Cohort**  
**Jacobson et al.**

**Appendix Table 2. AORs**

| Variable                    | Panel A: Ever tested for SARS-CoV-2 | Panel B: Ever tested positive for SARS-CoV-2 | Panel C: COVID-19 hospitalization | Panel D: COVID-19 death |
|-----------------------------|-------------------------------------|----------------------------------------------|-----------------------------------|-------------------------|
|                             | OR (95% CI)                         | OR (95% CI)                                  | OR (95% CI)                       | OR (95% CI)             |
| White (ref)                 |                                     |                                              |                                   |                         |
| Asian                       | 0.90 (0.86, 0.95)                   | 1.28 (1.11, 1.47)                            | 1.44 (0.83, 2.51)                 | 2.01 (0.83, 4.91)       |
| Black                       | 0.91 (0.86, 0.95)                   | 0.85 (0.73, 0.98)                            | 1.41 (0.80, 2.48)                 | 3.09 (1.26, 7.62)       |
| Latino                      | 1.35 (1.29, 1.40)                   | 3.58 (3.23, 3.96)                            | 3.42 (2.18, 5.35)                 | 5.70 (2.63, 12.38)      |
| Other <sup>a</sup>          | 0.81 (0.77, 0.86)                   | 1.11 (0.95, 1.29)                            | 0.57 (0.24, 1.40)                 | 0.91 (0.24, 3.49)       |
| Asthma                      | 1.50 (1.43, 1.57)                   | 1.14 (1.02, 1.27)                            | 1.23 (0.78, 1.93)                 | 0.75 (0.34, 1.67)       |
| Cancer                      | 1.39 (1.29, 1.50)                   | 1.05 (0.86, 1.28)                            | 1.53 (0.88, 2.64)                 | 0.79 (0.34, 1.84)       |
| Pain <sup>b</sup>           | 1.39 (1.33, 1.45)                   | 1.18 (1.06, 1.31)                            | 1.18 (0.80, 1.75)                 | 1.40 (0.82, 2.39)       |
| Diabetes                    | 1.22 (1.16, 1.28)                   | 1.23 (1.11, 1.37)                            | 1.55 (1.07, 2.25)                 | 1.60 (0.98, 2.62)       |
| COPD                        | 1.37 (1.25, 1.49)                   | 0.83 (0.63, 1.09)                            | 1.82 (1.00, 3.30)                 | 2.29 (1.17, 4.46)       |
| Hypertension                | 1.26 (1.21, 1.32)                   | 1.20 (1.08, 1.32)                            | 1.05 (0.71, 1.53)                 | 0.60 (0.36, 1.00)       |
| Age 18–29, years (ref)      |                                     |                                              |                                   |                         |
| Age 30–39                   | 1.08 (1.03, 1.13)                   | 1.04 (0.94, 1.16)                            | 1.18 (0.62, 2.24)                 | 1.35 (0.08, 21.68)      |
| Age 40–49                   | 1.05 (1.00, 1.11)                   | 0.99 (0.88, 1.11)                            | 1.36 (0.71, 2.62)                 | 8.65 (1.01, 74.30)      |
| Age 50–64                   | 0.94 (0.89, 0.98)                   | 0.79 (0.71, 0.89)                            | 2.17 (1.24, 3.80)                 | 18.03 (2.36, 137.76)    |
| Age 65–74                   | 0.72 (0.68, 0.77)                   | 0.58 (0.49, 0.67)                            | 3.40 (1.84, 6.28)                 | 54.40 (7.11, 416.36)    |
| Age 75–84                   | 0.51 (0.46, 0.56)                   | 0.51 (0.40, 0.64)                            | 3.38 (1.62, 7.05)                 | 194.66 (25.54, 1483.75) |
| Age ≥85                     | 0.36 (0.31, 0.43)                   | 0.34 (0.22, 0.53)                            | 3.20 (1.13, 9.04)                 | 246.83 (30.51, 1997.18) |
| BMI >30 or not              | 0.68 (0.65, 0.70)                   | 0.86 (0.79, 0.92)                            | 0.78 (0.54, 1.13)                 | 1.37 (0.82, 2.30)       |
| Female vs male <sup>f</sup> | 1.24 (1.20, 1.28)                   | 1.30 (1.21, 1.40)                            | 0.96 (0.70, 1.32)                 | 0.60 (0.38, 0.93)       |
| Observations                | 84,328                              | 84,328                                       | 84,328                            | 84,328                  |
| Mean rate                   | 29.1 <sup>c</sup>                   | 3.97 <sup>d</sup>                            | 19.7 <sup>e</sup>                 | 9.37 <sup>e</sup>       |
| Fully adjusted model        |                                     |                                              |                                   |                         |
| White (ref)                 |                                     |                                              |                                   |                         |
| Asian                       | 0.86 (0.79, 0.94)                   | 1.19 (1.01, 1.40)                            | 1.35 (0.66, 2.74)                 | 1.73 (0.60, 4.96)       |
| Black                       | 0.87 (0.81, 0.93)                   | 0.76 (0.63, 0.91)                            | 1.29 (0.80, 2.08)                 | 2.29 (0.86, 6.09)       |
| Latino                      | 1.27 (1.18, 1.37)                   | 3.15 (2.63, 3.77)                            | 3.23 (2.06, 5.08)                 | 4.11 (1.90, 8.86)       |
| Other <sup>a</sup>          | 0.79 (0.72, 0.87)                   | 1.06 (0.86, 1.31)                            | 0.56 (0.24, 1.27)                 | 0.83 (0.19, 3.61)       |

**Appendix**  
**Racial and Ethnic Disparities in SARS-CoV-2 Testing and COVID-19 Outcomes in a Medicaid Managed Care Cohort**  
**Jacobson et al.**

|                                   |                       |                         |                           |                           |
|-----------------------------------|-----------------------|-------------------------|---------------------------|---------------------------|
| Asthma                            | 1.51 (1.43, 1.59)     | 1.16 (1.03, 1.29)       | 1.29 (0.77, 2.17)         | 0.75 (0.33, 1.68)         |
| Cancer                            | 1.39 (1.27, 1.51)     | 1.03 (0.87, 1.22)       | 1.55 (0.94, 2.57)         | 0.82 (0.35, 1.90)         |
| Pain <sup>b</sup>                 | 1.40 (1.34, 1.46)     | 1.19 (1.10, 1.27)       | 1.17 (0.77, 1.80)         | 1.39 (0.89, 2.16)         |
| Diabetes                          | 1.21 (1.15, 1.28)     | 1.21 (1.09, 1.33)       | 1.58 (1.12, 2.22)         | 1.52 (1.09, 2.14)         |
| COPD                              | 1.34 (1.22, 1.47)     | 0.79 (0.59, 1.05)       | 1.69 (1.17, 2.44)         | 2.19 (1.13, 4.25)         |
| Hypertension                      | 1.26 (1.22, 1.30)     | 1.18 (1.07, 1.30)       | 1.04 (0.64, 1.70)         | 0.59 (0.28, 1.22)         |
| Age 18–29, years (ref)            |                       |                         |                           |                           |
| Female vs male <sup>f</sup>       | 1.07 (1.01, 1.13)     | 1.05 (0.96, 1.16)       | 1.18 (0.68, 2.05)         | 1.37 (0.09, 22.21)        |
| Age 40–49                         | 1.05 (1.00, 1.10)     | 1.00 (0.91, 1.09)       | 1.35 (0.84, 2.18)         | 8.84 (1.03, 76.06)        |
| Age 50–64                         | 0.94 (0.89, 0.99)     | 0.81 (0.74, 0.89)       | 2.10 (1.36, 3.24)         | 18.54 (4.12, 83.37)       |
| Age 65–74                         | 0.72 (0.67, 0.78)     | 0.60 (0.47, 0.76)       | 3.33 (1.79, 6.21)         | 57.58 (6.17, 537.72)      |
| Age 75–84                         | 0.51 (0.46, 0.57)     | 0.53 (0.41, 0.69)       | 3.35 (1.50, 7.48)         | 205.29 (20.09, 2097.93)   |
| Age ≥85                           | 0.36 (0.30, 0.44)     | 0.34 (0.25, 0.45)       | 3.11 (1.27, 7.58)         | 270.92 (24.81, 2957.98)   |
| BMI >30 or not                    | 0.68 (0.65, 0.71)     | 0.86 (0.81, 0.91)       | 0.79 (0.61, 1.02)         | 1.41 (0.95, 2.09)         |
| Female vs male                    | 1.24 (1.20, 1.29)     | 1.30 (1.21, 1.40)       | 0.97 (0.81, 1.17)         | 0.60 (0.39, 0.90)         |
| ZIP code characteristics          |                       |                         |                           |                           |
| Median income                     | 1.00 (1.00, 1.00)     | 1.00 (1.00, 1.00)       | 1.00 (1.00, 1.00)         | 1.00 (1.00, 1.00)         |
| Average HH size                   | 0.81 (0.66, 0.99)     | 0.91 (0.70, 1.19)       | 0.91 (0.37, 2.19)         | 4.43 (2.42, 8.10)         |
| Share employed                    | 19.70 (3.52, 110.37)  | 300.38 (31.34, 2878.63) | 6.35 (0.00, 9810.61)      | 303.21 (1.92, 47402.18)   |
| Share uninsured                   | 0.05 (0.01, 0.51)     | 0.24 (0.01, 4.96)       | 0.00 (0.00, 26.72)        | 0.02 (0.00, 204.07)       |
| Share cash assistance             | 0.00 (0.00, 0.00)     | 0.00 (0.00, 0.01)       | 0.00 (0.00, 0.00)         | 8.18e+07 (2.78, 2.46e+15) |
| Share Social Security             | 1.17 (0.38, 3.60)     | 6.58 (1.28, 33.85)      | 0.55 (0.00, 295.45)       | 0.07 (0.00, 15.91)        |
| Share receiving SNAP              | 617.20 (15.89, 24063) | 5793.69 (59.10, 567194) | 16161.15 (7.22, 3.62e+07) | 0.00 (0.00, 0.00)         |
| Share detached single family home | 0.90 (0.56, 1.44)     | 1.09 (0.65, 1.85)       | 0.55 (0.07, 4.21)         | 1.21 (0.19, 7.76)         |
| Observations                      | 83,292                | 83,292                  | 83,292                    | 83,292                    |
| Mean outcome                      | 29.1 <sup>c</sup>     | 3.97 <sup>d</sup>       | 19.7 <sup>e</sup>         | 9.37 <sup>e</sup>         |

<sup>a</sup>Due to small numbers (N=280), American Indian/Native Alaskan is included with Other/Unknown.

<sup>b</sup>Patients with a chronic pain diagnosis in the electronic health record.

**Appendix**  
**Racial and Ethnic Disparities in SARS-CoV-2 Testing and COVID-19 Outcomes in a Medicaid Managed Care Cohort**  
**Jacobson et al.**

<sup>c</sup>Percent of all patients who had at least one test for SARS-CoV-2.

<sup>d</sup>Ever tested positive is denominated by all impaneled patients, irrespective of whether they were ever tested for SARS-CoV-2.

<sup>e</sup>Hospitalization and Death rate are per 10,000.

<sup>f</sup>The 18 patients who self-identified as non-binary or gender unknown were dropped in these models.

COPD, chronic obstructive pulmonary disease; HH, household; SNAP, Supplemental Nutrition Assistance Program.

**Appendix**  
**Racial and Ethnic Disparities in SARS-CoV-2 Testing and COVID-19 Outcomes in a Medicaid Managed Care Cohort**  
**Jacobson et al.**

**Appendix Table 3.** Ever Had a RT-PCR Test for SARS-CoV-2

| <b>Variable</b>    | <b>Unadjusted<br/>OR (95% CI)</b> | <b>Demographic + health adjusted<sup>a</sup><br/>OR (95% CI)</b> | <b>Demographic, health + ZIP code adjusted<sup>a</sup><br/>OR (95% CI)</b> |
|--------------------|-----------------------------------|------------------------------------------------------------------|----------------------------------------------------------------------------|
| White (ref)        |                                   |                                                                  |                                                                            |
| Asian              | 0.89 (0.85, 0.94)                 | 0.93 (0.88, 0.98)                                                | 0.89 (0.81, 0.97)                                                          |
| Black              | 0.94 (0.90, 0.99)                 | 0.92 (0.88, 0.97)                                                | 0.88 (0.83, 0.94)                                                          |
| Latino             | 1.33 (1.27, 1.38)                 | 1.37 (1.32, 1.43)                                                | 1.30 (1.20, 1.41)                                                          |
| Other <sup>b</sup> | 0.69 (0.65, 0.73)                 | 0.83 (0.78, 0.87)                                                | 0.81 (0.74, 0.89)                                                          |
| Observations       | 84,346                            | 84,328                                                           | 83,292                                                                     |
| Mean outcome       | 28.1%                             | 28.1%                                                            | 28.2%                                                                      |

<sup>a</sup>The 18 patients who self-identified as non-binary or gender unknown were dropped in these models.

<sup>b</sup> Due to small numbers American Indian/Native Alaskan is included with Other/Unknown.

RT-PCR, reverse transcriptase polymerase chain reaction.



**Appendix**  
**Racial and Ethnic Disparities in SARS-CoV-2 Testing and COVID-19 Outcomes in a Medicaid Managed Care Cohort**  
**Jacobson et al.**

**Appendix Table 4.** Number of Tests for SARS-CoV-2<sup>a</sup>

| Variable                  | Unadjusted                    | Demographic + health adjusted <sup>b</sup> | Demographic, health + ZIP code adjusted <sup>b</sup> |
|---------------------------|-------------------------------|--------------------------------------------|------------------------------------------------------|
|                           | Incident rate ratios (95% CI) | Incident rate ratios (95% CI)              | Incident rate ratios (95% CI)                        |
| White (ref)               |                               |                                            |                                                      |
| Asian                     | 0.86 (0.82, 0.90)             | 0.88 (0.84, 0.93)                          | 0.88 (0.81, 0.95)                                    |
| Black                     | 0.87 (0.83, 0.91)             | 0.85 (0.81, 0.89)                          | 0.86 (0.80, 0.93)                                    |
| Latino                    | 1.05 (1.01, 1.09)             | 1.07 (1.03, 1.11)                          | 1.07 (1.01, 1.13)                                    |
| Other <sup>c</sup>        | 0.72 (0.69, 0.76)             | 0.81 (0.77, 0.85)                          | 0.82 (0.76, 0.89)                                    |
| Observations              | 84,346                        | 84,328                                     | 83,292                                               |
| Mean outcome <sup>d</sup> | 0.55                          | 0.55                                       | 0.56                                                 |

<sup>a</sup>Estimates are from negative binomial regression models.

<sup>b</sup>The 18 patients who self-identified as non-binary or gender unknown were dropped in these models.

<sup>c</sup>Due to small numbers American Indian/Native Alaskan is included with Other/Unknown.

<sup>d</sup>The mean number of tests is for all impaneled patients including those who were never tested.

**Appendix**  
**Racial and Ethnic Disparities in SARS-CoV-2 Testing and COVID-19 Outcomes in a Medicaid Managed Care Cohort**  
**Jacobson et al.**

**Appendix Table 5.** Ever Had a Positive RT-PCR Test

| Variable           | Unadjusted<br>OR (95% CI) | Demographic + health adjusted <sup>a</sup><br>OR (95% CI) | Demographic, health + ZIP code adjusted <sup>a</sup><br>OR (95% CI) |
|--------------------|---------------------------|-----------------------------------------------------------|---------------------------------------------------------------------|
| White (ref)        |                           |                                                           |                                                                     |
| Asian              | 1.27 (1.10, 1.45)         | 1.29 (1.12, 1.48)                                         | 1.20 (1.02, 1.41)                                                   |
| Black              | 0.89 (0.77, 1.03)         | 0.84 (0.72, 0.98)                                         | 0.75 (0.62, 0.91)                                                   |
| Latino             | 3.76 (3.40, 4.16)         | 3.56 (3.21, 3.95)                                         | 3.14 (2.61, 3.76)                                                   |
| Other <sup>b</sup> | 1.07 (0.92, 1.24)         | 1.11 (0.95, 1.29)                                         | 1.06 (0.86, 1.31)                                                   |
| Observations       | 84,346                    | 84,328                                                    | 83,292                                                              |
| Mean outcome       | 3.94%                     | 3.94%                                                     | 3.99%                                                               |

<sup>a</sup>The 18 patients who self-identified as non-binary or gender unknown were dropped in these models.

<sup>b</sup>Due to small numbers American Indian/Native Alaskan is included with Other/Unknown.

RT-PCR, reverse transcriptase polymerase chain reaction .

**Appendix**  
**Racial and Ethnic Disparities in SARS-CoV-2 Testing and COVID-19 Outcomes in a Medicaid Managed Care Cohort**  
**Jacobson et al.**

**Appendix Table 6.** SARS-CoV-2 Test Positivity<sup>a</sup>

| Variable           | Unadjusted<br>OR (95% CI) | Demographic + health adjusted <sup>b</sup><br>OR (95% CI) | Demographic, health + ZIP code adjusted <sup>b</sup><br>OR (95% CI) |
|--------------------|---------------------------|-----------------------------------------------------------|---------------------------------------------------------------------|
| White (ref)        |                           |                                                           |                                                                     |
| Asian              | 1.42 (1.23, 1.64)         | 1.40 (1.21, 1.62)                                         | 1.34 (1.13, 1.58)                                                   |
| Black              | 0.94 (0.81, 1.09)         | 0.91 (0.78, 1.06)                                         | 0.84 (0.70, 1.00)                                                   |
| Latino             | 3.56 (3.21, 3.96)         | 3.27 (2.94, 3.64)                                         | 2.98 (2.50, 3.54)                                                   |
| Other <sup>c</sup> | 1.49 (1.28, 1.74)         | 1.37 (1.17, 1.60)                                         | 1.32 (1.07, 1.62)                                                   |
| Observations       | 24,508                    | 24,506                                                    | 24,333                                                              |
| Mean outcome       | 13.7                      | 13.7                                                      | 13.7                                                                |

<sup>a</sup>Positivity is expressed as the number of patients who ever tested positive relative to the number ever tested for COVID-19.

<sup>b</sup>The 18 patients who self-identified as non-binary or gender unknown were dropped in these models.

<sup>c</sup>Due to small numbers American Indian/Native Alaskan is included with Other/Unknown.

**Appendix**  
**Racial and Ethnic Disparities in SARS-CoV-2 Testing and COVID-19 Outcomes in a Medicaid Managed Care Cohort**  
**Jacobson et al.**

**Appendix Table 7.** AORs With Alternate Codings for Other/Unknown Race<sup>a</sup>

| Variable                          | Panel A: Ever tested<br>for SARS-CoV-2 | Panel B: Ever tested<br>positive for SARS-<br>CoV-2 | Panel C: COVID-<br>19 hospitalization | Panel D: COVID-<br>19 death |
|-----------------------------------|----------------------------------------|-----------------------------------------------------|---------------------------------------|-----------------------------|
|                                   | OR (95% CI)                            | OR (95% CI)                                         | OR (95% CI)                           | OR (95% CI)                 |
| Panel A: Recode Unknown as Latino |                                        |                                                     |                                       |                             |
| Asian                             | 0.85 (0.77, 0.93)                      | 1.15 (0.97, 1.36)                                   | 1.29 (0.63, 2.62)                     | 1.66 (0.58, 4.78)           |
| Black                             | 0.85 (0.80, 0.91)                      | 0.74 (0.61, 0.89)                                   | 1.25 (0.78, 2.01)                     | 2.23 (0.84, 5.95)           |
| Latino                            | 1.11 (1.01, 1.21)                      | 2.73 (2.23, 3.33)                                   | 2.82 (1.81, 4.38)                     | 3.66 (1.68, 7.97)           |
| Other                             | 1.05 (0.96, 1.16)                      | 1.32 (1.05, 1.64)                                   | 0.70 (0.27, 1.78)                     | 0.92 (0.18, 4.70)           |
| Panel B: Recode Unknown as Asian  |                                        |                                                     |                                       |                             |
| Asian                             | 0.75 (0.69, 0.82)                      | 1.05 (0.90, 1.23)                                   | 1.16 (0.57, 2.36)                     | 1.56 (0.54, 4.47)           |
| Black                             | 0.87 (0.81, 0.93)                      | 0.76 (0.63, 0.91)                                   | 1.29 (0.80, 2.08)                     | 2.28 (0.86, 6.07)           |
| Latino                            | 1.27 (1.18, 1.37)                      | 3.15 (2.63, 3.77)                                   | 3.22 (2.05, 5.06)                     | 4.09 (1.90, 8.82)           |
| Other                             | 1.06 (0.97, 1.17)                      | 1.34 (1.08, 1.66)                                   | 0.71 (0.28, 1.82)                     | 0.93 (0.18, 4.75)           |
| Panel C: Recode Unknown as Black  |                                        |                                                     |                                       |                             |
| Asian                             | 0.86 (0.79, 0.95)                      | 1.20 (1.02, 1.41)                                   | 1.34 (0.66, 2.72)                     | 1.72 (0.60, 4.93)           |
| Black                             | 0.76 (0.70, 0.82)                      | 0.74 (0.60, 0.92)                                   | 1.10 (0.66, 1.81)                     | 1.94 (0.71, 5.31)           |
| Latino                            | 1.27 (1.17, 1.37)                      | 3.15 (2.63, 3.77)                                   | 3.22 (2.05, 5.05)                     | 4.10 (1.91, 8.83)           |
| Other                             | 1.06 (0.96, 1.17)                      | 1.34 (1.08, 1.66)                                   | 0.71 (0.28, 1.82)                     | 0.93 (0.18, 4.75)           |
| Panel D: Recode Unknown as White  |                                        |                                                     |                                       |                             |
| Asian                             | 0.96 (0.88, 1.06)                      | 1.27 (1.07, 1.50)                                   | 1.48 (0.73, 3.01)                     | 1.82 (0.69, 4.84)           |
| Black                             | 0.97 (0.91, 1.04)                      | 0.81 (0.70, 0.94)                                   | 1.43 (0.90, 2.26)                     | 2.41 (1.02, 5.71)           |
| Latino                            | 1.44 (1.32, 1.56)                      | 3.36 (2.84, 3.99)                                   | 3.58 (2.21, 5.79)                     | 4.33 (2.21, 8.48)           |
| Other                             | 1.19 (1.08, 1.32)                      | 1.43 (1.15, 1.77)                                   | 0.78 (0.30, 2.01)                     | 0.98 (0.21, 4.72)           |
| Observations <sup>b</sup>         | 83,292                                 | 83,292                                              | 83,292                                | 83,292                      |
| Mean outcome                      | 29.2                                   | 4.02 <sup>c</sup>                                   | 19.8 <sup>d</sup>                     | 9.48 <sup>d</sup>           |

<sup>a</sup>Estimates from fully adjusted models that code those of unknown race as Latino, Asian, Black or White in Panels A, B, C, and D respectively.

<sup>b</sup>The 18 patients who self-identified as non-binary or gender unknown were dropped in these models.

<sup>c</sup>Percent positive is for all impaneled patients irrespective of whether they were tested.

<sup>d</sup>Hospitalization and death rates are per 10,000.
